# Supplementary material for: Direct estimation of cause-specific mortality fractions from verbal autopsies: multisite validation study using clinical diagnostic gold standards
Source: Popul Health Metr. 2011 Aug 4;9:35. doi: 10.1186/1478-7954-9-35 (PMC3160928; doi:10.1186/1478-7954-9-35)
Supplement: Additional file 1 — Slope, intercept, and RMSE from linear regression of estimated versus true CSMFs, by age group and cause with and without HCE. [file 1478-7954-9-35-S1.XLSX]

## Sheet: Annex 1
Adult Causes	Slope		Intercept		RMSE
	No HCE	HCE	No HCE	HCE	No HCE	HCE
Acute Myocardial Infarction	0.367322	0.385232	0.0229337	0.0208397	0.010867	0.00985423
AIDS	0.398944	0.414592	0.0362789	0.0344074	0.0124185	0.0114344
Asthma	0.0903027	0.12803	0.0106228	0.0104501	0.00318179	0.00329637
Bite of Venomous Animal	0.287773	0.31057	0.0122343	0.0126629	0.00601732	0.00578769
Breast Cancer	0.256457	0.299645	0.0164324	0.0160463	0.00661806	0.00654432
Cervical Cancer	0.488053	0.46227	0.0141727	0.0149945	0.00963737	0.00951916
Cirrhosis	0.352036	0.359403	0.0215706	0.0203003	0.00998766	0.0090492
Colorectal Cancer	0.101878	0.113769	0.015853	0.0164508	0.00593309	0.00617738
COPD	0.207934	0.234394	0.019267	0.0195183	0.00695561	0.00699915
Diabetes	0.14672	0.198956	0.0503777	0.0466579	0.00891642	0.00819364
Diarrhea/Dysentery	0.221523	0.208204	0.0186123	0.019012	0.00584951	0.00571823
Drowning	0.631176	0.584786	0.015239	0.0160564	0.0133732	0.0127946
Epilepsy	0.137362	0.142142	0.0100036	0.0102247	0.0031372	0.00305186
Esophageal Cancer	0.29908	0.302192	0.00904178	0.00976461	0.00440045	0.00460034
Falls	0.200376	0.194672	0.0228853	0.0228888	0.00804238	0.00753399
Fires	0.137234	0.155082	0.0194436	0.0188096	0.00675983	0.00656455
Homicide	0.364605	0.347132	0.0207951	0.0206232	0.0109882	0.0101318
Leukemia/Lymphomas	0.104797	0.131471	0.025948	0.0269224	0.0059355	0.00639124
Lung Cancer	0.168026	0.190144	0.0162781	0.0166678	0.00544797	0.0056642
Malaria	0.111689	0.124415	0.0131744	0.0134479	0.00493901	0.00496656
Maternal	0.563438	0.560762	0.0396676	0.0421361	0.0113291	0.0112638
Other Cardiovascular Diseases	0.0872238	0.12067	0.0473608	0.0451622	0.00977564	0.00883178
Other Infectious Diseases	0.122736	0.128063	0.0198773	0.0194188	0.00795311	0.00792452
Other Injuries	0.239706	0.247545	0.0191696	0.0192022	0.00983372	0.0098037
Other Noncommunicable Diseases	0.105595	0.116743	0.0691997	0.0686431	0.0117847	0.0116196
Pneumonia	0.131193	0.138965	0.0679194	0.0663846	0.0133132	0.0125789
Poisonings	0.125584	0.140624	0.0162156	0.0162264	0.00515115	0.00509118
Prostate Cancer	0.126246	0.131801	0.0118375	0.0125071	0.0036665	0.00379549
Renal Failure	0.15443	0.163323	0.024524	0.0226491	0.00821628	0.00777795
Road Traffic	0.238993	0.265001	0.0202526	0.0195174	0.00840394	0.0084464
Stomach Cancer	0.0801867	0.085619	0.013141	0.0139709	0.00409173	0.00437761
Stroke	0.446955	0.446275	0.0248839	0.0226995	0.0114665	0.0102767
Suicide	0.210225	0.221245	0.0185972	0.0186006	0.0073869	0.00735778
TB	0.313251	0.338433	0.0181282	0.0174569	0.00830918	0.00803964
Child Causes	Slope		Intercept		RMSE
	No HCE	HCE	No HCE	HCE	No HCE	HCE
AIDS	0.183368	0.224365	0.0159765	0.0157025	0.00702848	0.00734318
Bite of Venomous Animal	0.333288	0.475349	0.031094	0.0271688	0.0145499	0.0137928
Diarrhea/Dysentery	0.372858	0.372853	0.0529422	0.0500338	0.0229008	0.021494
Drowning	0.454525	0.442742	0.0251059	0.0266906	0.0201932	0.0197558
Encephalitis	0.178185	0.203754	0.0332355	0.0330592	0.013984	0.0142821
Falls	0.270103	0.269539	0.0336973	0.0338754	0.0149205	0.0144606
Fires	0.250332	0.287958	0.0396011	0.0363445	0.0183821	0.0166529
Hemorrhagic Fever	0.260566	0.316641	0.0333642	0.0324147	0.0151606	0.0151513
Malaria	0.412678	0.440726	0.0322827	0.0297113	0.0220913	0.020643
Measles	0.434999	0.484056	0.018818	0.018738	0.0113196	0.011534
Meningitis	0.126569	0.142213	0.0331936	0.0337625	0.01145	0.0116521
Other Cancers	0.101406	0.110953	0.0270009	0.0282059	0.00868176	0.00879862
Other Cardiovascular Diseases	0.1163	0.150751	0.0340958	0.0331557	0.0116111	0.0111686
Other Defined Causes of Child Deaths	0.224966	0.247055	0.0605325	0.0538064	0.0200511	0.0188262
Other Digestive Diseases	0.0923961	0.0936749	0.0306391	0.0314278	0.00957959	0.009485
Other Infectious Diseases	0.117456	0.11361	0.0517342	0.050916	0.0165775	0.0163223
Pneumonia	0.514351	0.517109	0.0566235	0.0524637	0.0286818	0.0259292
Poisonings	0.163289	0.170596	0.0198728	0.0210419	0.00840813	0.00822483
Road Traffic	0.315759	0.355105	0.0360191	0.0325176	0.0201774	0.017381
Sepsis	0.104049	0.101684	0.0487726	0.0501807	0.0159733	0.0158809
Violent Death	0.480479	0.430686	0.0236872	0.0257491	0.0164821	0.0146347
Neonate Causes	Slope		Intercept		RMSE
	No HCE	HCE	No HCE	HCE	No HCE	HCE
Birth Asphyxia	0.65954	0.658916	0.0583544	0.0569515	0.043175	0.0423513
Congenital Malformation	0.354107	0.365138	0.0821147	0.081386	0.0312612	0.0319676
Meningitis/Sepsis	0.525151	0.528767	0.0584477	0.0564439	0.0410259	0.0405795
Pneumonia	0.199117	0.206686	0.0528973	0.0523069	0.0258088	0.025846
Preterm Delivery and Sepsis	0.489303	0.496145	0.0330129	0.0338336	0.0157376	0.0158666
Preterm Delivery and Birth Asphyxia	0.53021	0.553404	0.0322644	0.031907	0.0135168	0.0135482
Preterm Delivery and Sepsis and Birth Asphyxia	0.397959	0.398051	0.0220106	0.0223218	0.010543	0.0107176
Preterm Delivery with RDS	0.605919	0.601689	0.0360086	0.0361007	0.0217753	0.0213517
Preterm Delivery without RDS	0.433714	0.430868	0.0566951	0.0562077	0.0209004	0.0204611
Sepsis with Local Bacterial Infection	0.49663	0.514248	0.02458	0.0244579	0.0158905	0.0157081
Stillbirth	0.981282	0.979678	0.00287254	0.00338497	0.0174626	0.0174164
